# Supplementary material for: Growth Differentiation Factor-15 Levels at Admission Provide Incremental Prognostic Information on All-Cause Long-term Mortality in ST-Segment Elevation Myocardial Infarction Patients Treated with Primary Percutaneous Coronary Intervention
Source: Springer Nature journal article supplement (doi:10.1007/s40119-019-0127-4), 2019-01-30

## Supplementary Material

Supplemental figure. Clinical pathway mapping of GDF-15 as an add-on test to improve clinical outcome. GDF-15 = growth differentiation factor-15; NTproBNP = N-terminal pro brain natriuretic peptide; pPCI = primary percutaneous coronary intervention; STEMI = ST-segment elevation myocardial infarction; TN = test negative; TP = test positive.

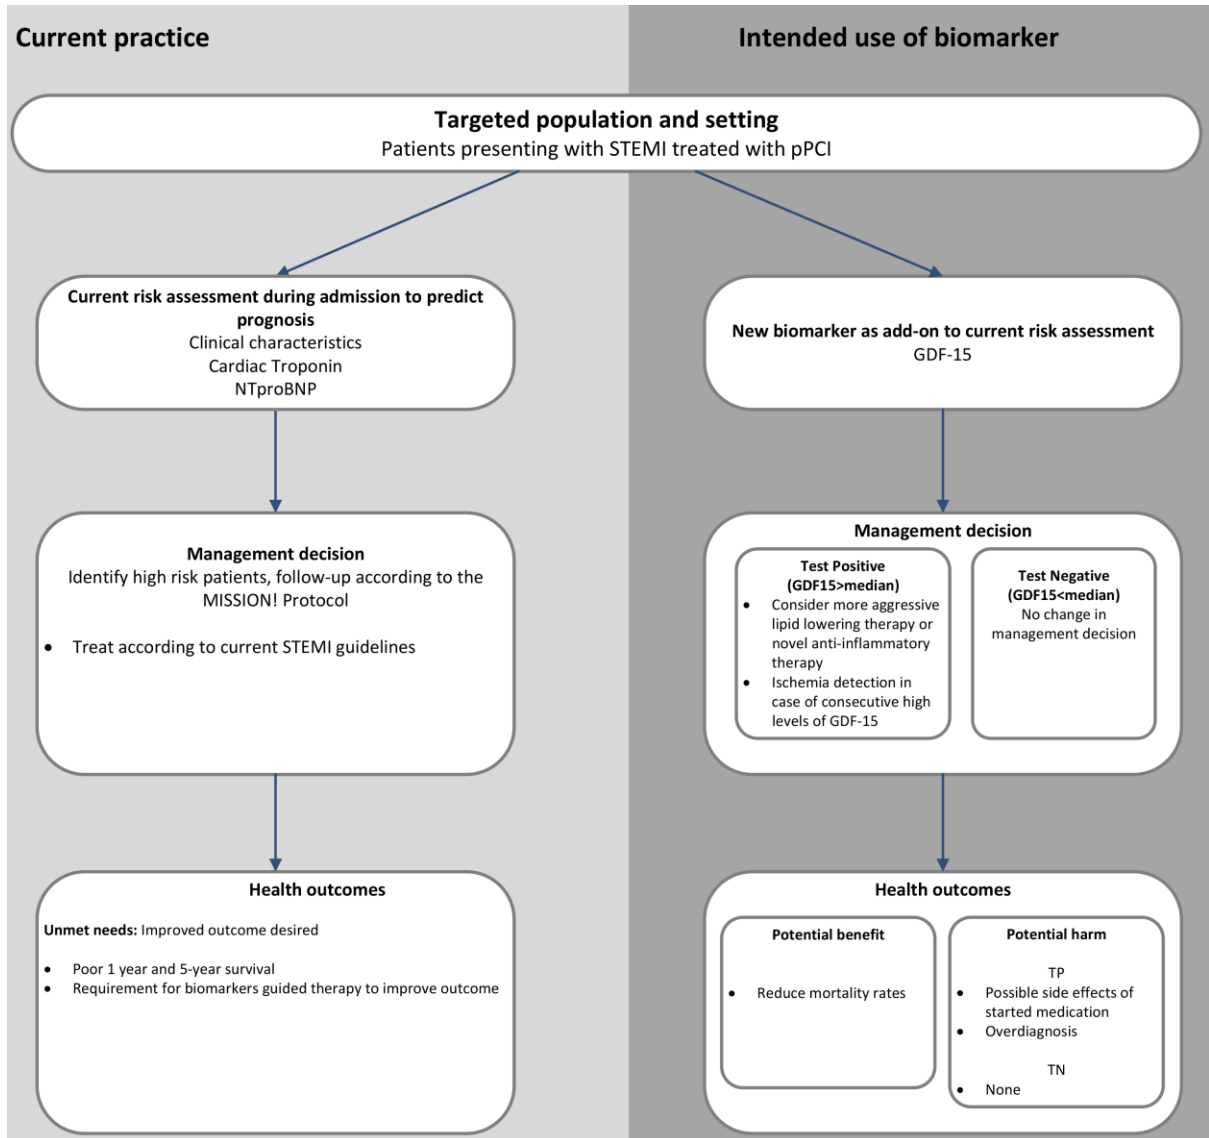

Supplement: MOESM1 [file 16430898]
